# Supplementary material for: Neratinib protects pancreatic beta cells in diabetes
Source: PubMed Central journal article supplement (PMC6825211; doi:10.1038/s41467-019-12880-5), 2019-11-01
Supplement: 41467_2019_12880_MOESM1_ESM.pdf [file 41467_2019_12880_MOESM1_ESM.pdf]

## **Supplementary Figures**

**Neratinib Protects Pancreatic Beta Cells in Diabetes**

**Ardestani et al.**

a

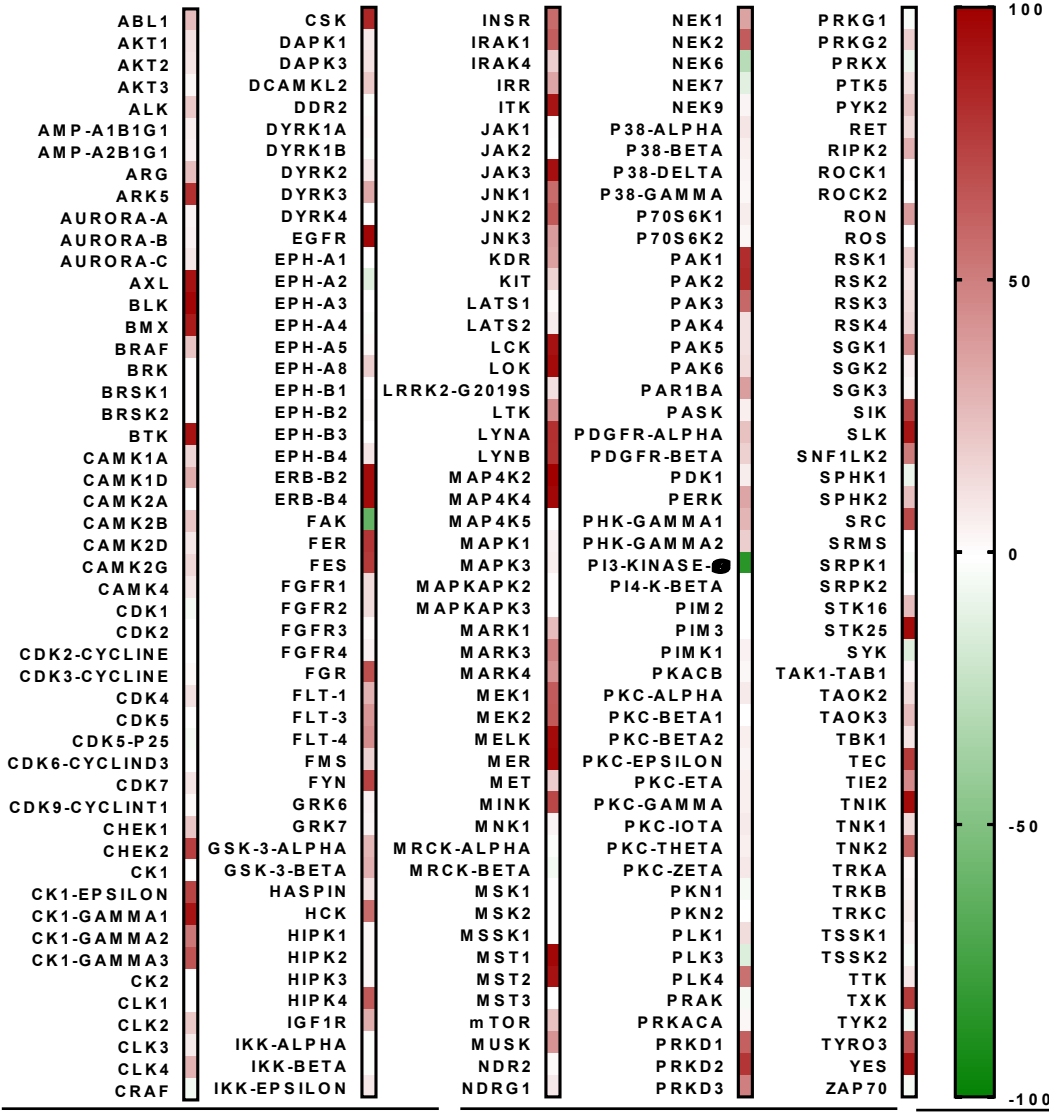

b

| Kinases | Neratinib (IC <sub>50</sub> uM) | Kinases | Neratinib (IC <sub>50</sub> uM) | Kinases | Neratinib (IC <sub>50</sub> uM) |
|---------|---------------------------------|---------|---------------------------------|---------|---------------------------------|
| IRAK1   | 2.48                            | PAK2    | 0.408                           | TNIK    | 0.081                           |
| LCK     | 0.066                           | PAK3    | 1.5                             | YES     | 0.087                           |
| LOK     | 0.066                           | PAK4    | >20                             | ARK5    | 0.583                           |
| LYNA    | 0.379                           | PAK5    | >20                             | AXL     | 0.185                           |
| LYNB    | 0.304                           | PAK6    | >20                             | CHEK2   | 0.937                           |
| MAP4K2  | 0.102                           | PHK1    | 5.85                            | EGFR    | 0.0003                          |
| MAP4K4  | 0.062                           | MST1    | 0.091                           | FES     | 1.0                             |
| MAP4K5  | 0.0001                          | MST2    | 0.21                            | HCK     | 2.75                            |
| MINK    | 0.943                           | MST3    | 0.005                           | HIPK1   | >20                             |
| MEK1    | 1.49                            | SIK     | 1.05                            | HIPK4   | 1.66                            |
| MEK2    | 1.2                             | SLK     | 0.177                           | MARK4   | 7.36                            |
| MER     | 0.026                           | SRC     | 0.727                           | BLK     | 0.016                           |
| PAK1    | 0.609                           | STK25   | 0.05                            |         |                                 |

**Supplementary Figure 1. Results of kinase profiling for Neratinib by Nanosyn.** (A) Neratinib was assayed at 3  $\mu$ M in duplicate wells against 250 biochemical kinase assays. % inhibition was determined for each assay. (B) Neratinib was assayed in a 12 points dose-dependent serial concentration and  $IC_{50}$  was determined against 38 biochemical kinases. Related to Figure 1.

Supplementary Figure 2

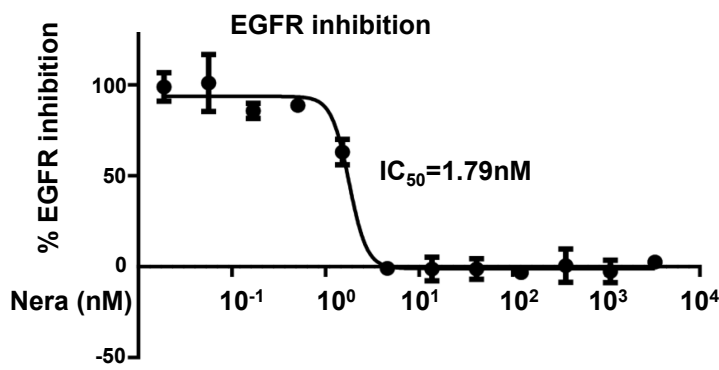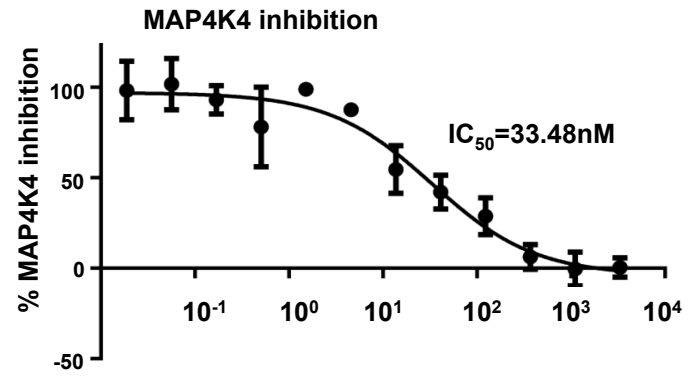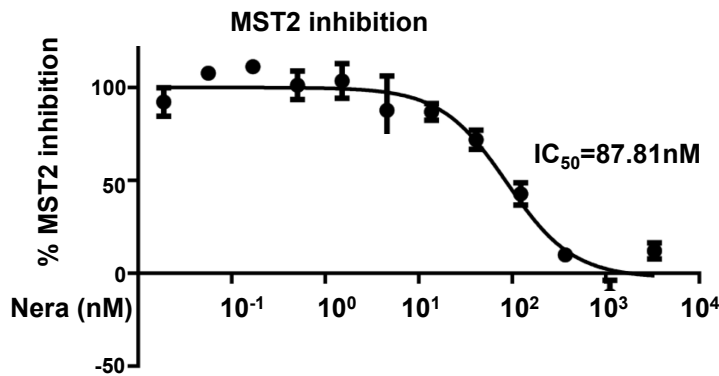

**Supplementary Figure 2. Neratinib's effect on EGFR, MAP4K4 and MST2 inhibition.** Biochemical dose response of EGFR, MAP4K4 and MST2 inhibition by neratinib. Data show means  $\pm$ SEM from 3 independent experiments (n=3). Related to Figure 1.



Supplementary Figure 3

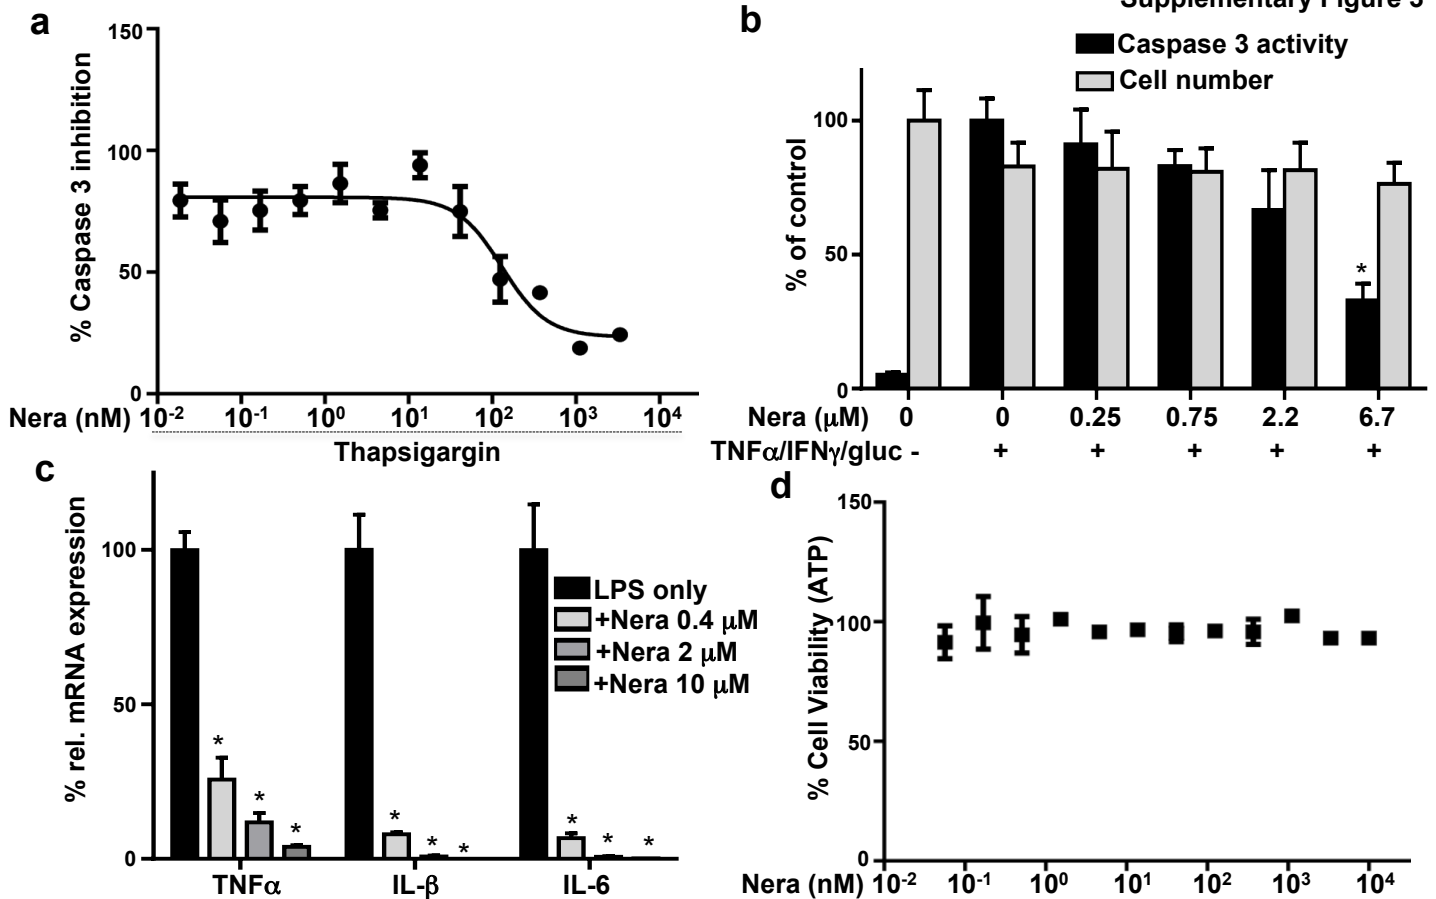

**Supplementary Figure 3. Neratinib protects INS-1E  $\beta$ -cells from ER and cytokine induced stresses.** (A) Caspase-3 activation induced by thapsigargin mediated ER stress. INS-1E cells were treated with compounds in a dose-dependent manner at  $10^4$  cells/well. Apoptosis was induced after 24 hours by  $0.1 \mu\text{M}$  thapsigargin with caspase-3 substrate Nucview488. 16 hours later, cells were fixed in 3% paraformaldehyde and stained with Hoechst33342. Data analysis is based on the fluorescence intensity of Nucview 488 and Hoechst33342, with normalization to cell cytotoxicity, which was evaluated through Celltiter-Glo. (B) Caspase-3 activation induced by cytokine mixture at high glucose. INS-1E cells were exposed up to  $6.7 \mu\text{M}$  of neratinib for 2h followed by 16h of induction in  $100 \text{ ng/mL}$  of TNF $\alpha$  and  $200 \text{ ng/mL}$  of IFN $\gamma$  with  $33 \text{ mM}$  glucose in assay medium. Caspase-3 activity was evaluated through Nucview488 and Hoechst33342. (C) Anti-inflammatory effect of neratinib through gene expression assay (RT-PCR). Mouse macrophage Raw264.7 cells were treated with neratinib in different concentrations for 2 hours, and followed by  $100 \text{ ng/mL}$  LPS stimulation for 4 hours. Cells were harvested and gene expression of TNF $\alpha$ , IL-6 and IL-1 $\beta$  were analyzed through qRT-PCR. (D) Cytotoxicity of neratinib evaluated by CellTiter-Glo®. INS1E cells were treated with neratinib in a dose-dependent manner at  $10^4$  cells/well. 24 hours later, Celltiter-Glo® reagent was added to each well and luminescence intensity was detected on plate reader. Data show means $\pm$ SD from 3 independent experiments ( $n=3$ ). \* $p<0.01$  neratinib compared to vehicle treated cells. Related to Figure 2.

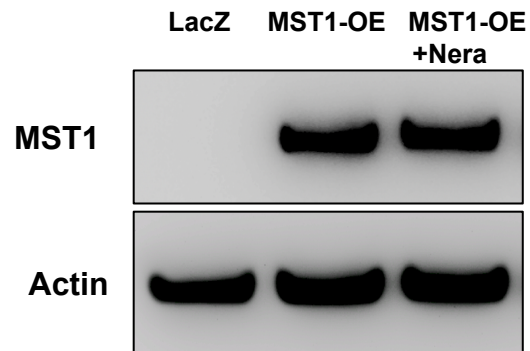

**Supplementary Figure 4. MST1 overexpression in human islets.** Human islets were infected with Ad-LacZ (control) or Ad-MST1 adenoviruses and exposed to 10 μM neratinib for 48h; successful MST1 overexpression is shown by western blot analysis. Related to Figure 3.

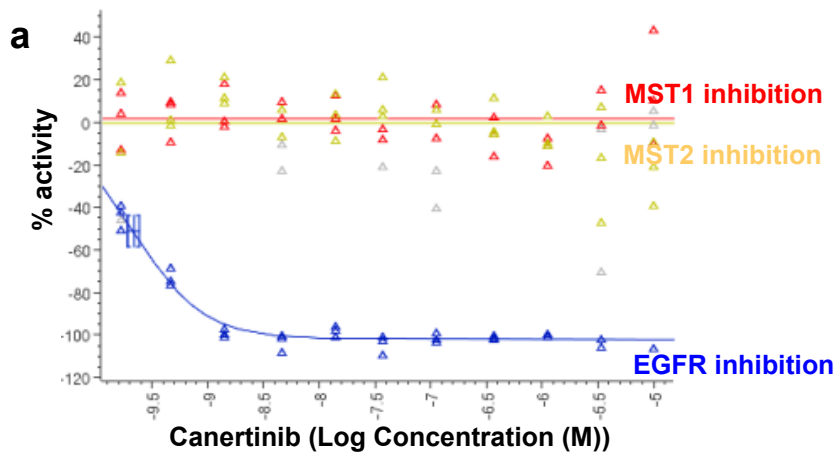

**Supplementary Figure 5. Canertinib's effect on EGFR, MST1 and MST2 inhibition.** Biochemical kinase assays in dose response to EGFR (blue), MST1 (red) and MST2 (yellow) inhibition by canertinib (**A**) and IC<sub>50</sub> summary table (**B**). Data show means from 3 independent experiments (n=3). Related to Figure 5.

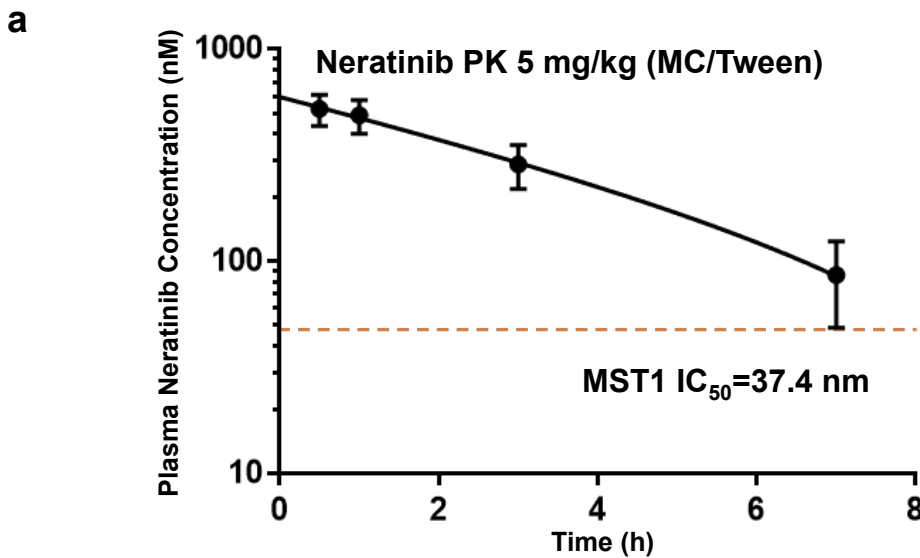

| Animal  | t <sub>1/2</sub><br>(hr) | C <sub>max</sub><br>(nM) | T <sub>max</sub><br>(hr) | AUC <sub>0-24</sub><br>(hr*nM) | AUC <sub>LAST</sub><br>(hr*nM) | AUC <sub>INF</sub><br>(hr*nM) | Cl<br>(mL/min/kg) | MRT<br>(hr) | V <sub>D</sub><br>(L/kg) |
|---------|--------------------------|--------------------------|--------------------------|--------------------------------|--------------------------------|-------------------------------|-------------------|-------------|--------------------------|
| 1       | 4.0                      | 468.6                    | 0.5                      | 1621.8                         | 1621.8                         | 2364.4                        | 253.1             | 2.7         | 86.9                     |
| 2       | 1.9                      | 556.6                    | 1.0                      | 1967.1                         | 1967.1                         | 2153.7                        | 277.9             | 2.3         | 46.7                     |
| 3       | 1.9                      | 623.0                    | 0.5                      | 2125.2                         | 2125.2                         | 2298.5                        | 260.4             | 2.3         | 43.1                     |
| AVERAGE | 2.6                      | 549.4                    | 0.7                      | 1904.7                         | 1904.7                         | 2272.2                        | 263.8             | 2.4         | 58.9                     |
| ST DEV  | 1.2                      | 77.4                     | 0.3                      | 257.4                          | 257.4                          | 107.8                         | 12.7              | 0.2         | 24.3                     |
| CV%     | 0.5                      | 0.1                      | 0.4                      | 0.1                            | 0.1                            | 0.0                           | 0.0               | 0.1         | 0.4                      |

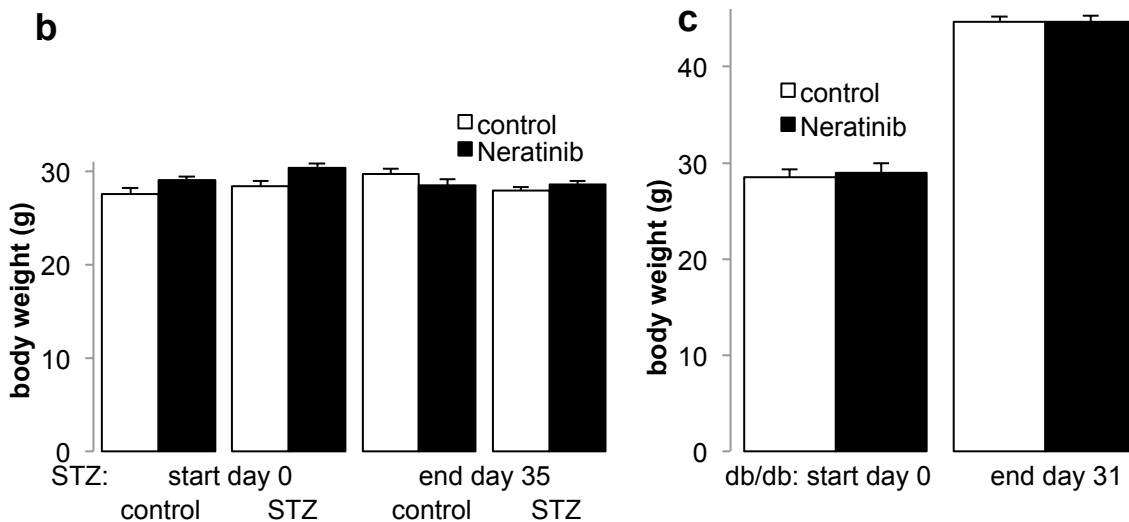

**Supplementary Figure 6. (a) Neratinib's IP PK profile in mice and body weights.** Neratinib was dosed at 5 mg/kg IP to mice (n=3) which were fasted overnight. The compound was administered in 30% PEG400: 0.5% Tween80: 5% propylene glycol in saline through a single dose. Plasma samples were collected at 30 min., 1, 3 and 7 h post dosing and analyzed by LC-MS to determine the plasma Neratinib concentration. **(b,c)** Mean body weights of all mice in the study from the MLD-STZ mice and db/db mice. Related to Figures 6 and 7.

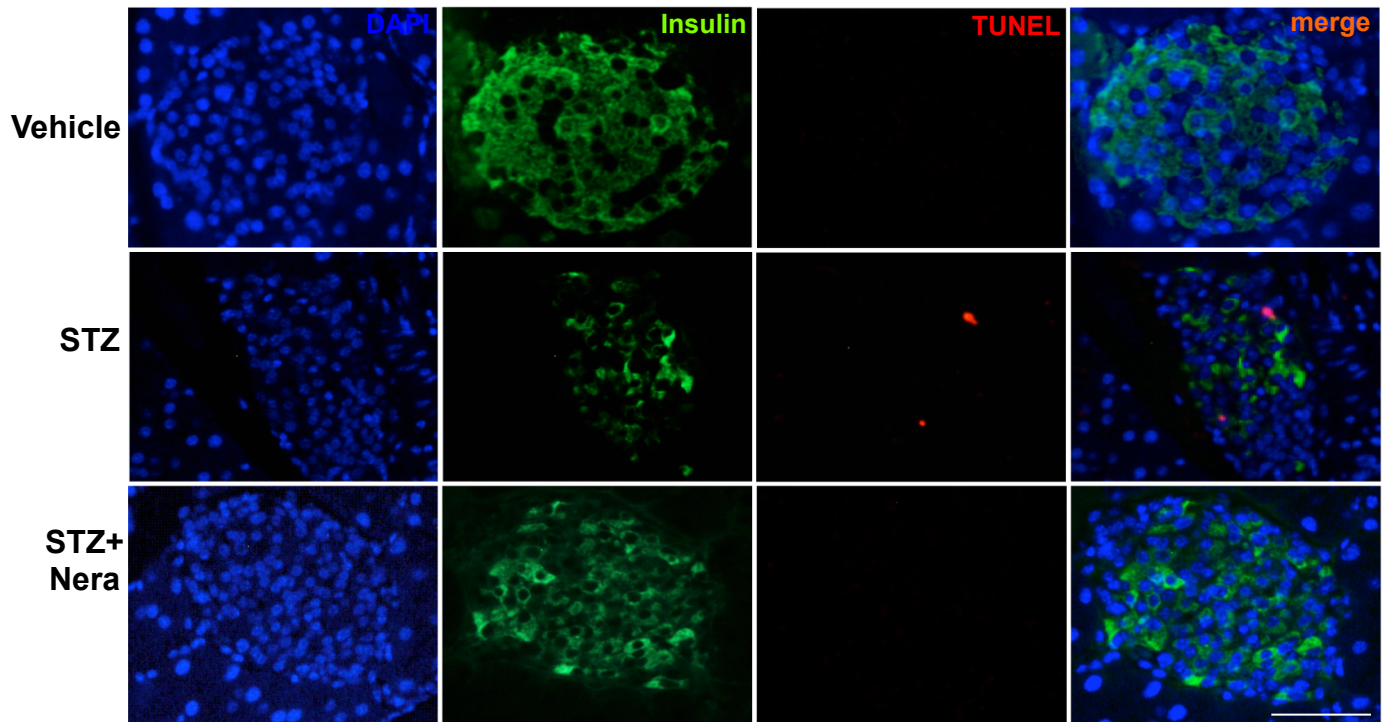

**Supplementary Figure 7. Neratinib restores  $\beta$ -cell survival in MLD-STZ-induced diabetes.** Representative triple-stainings of pancreatic sections for TUNEL (red), insulin (green) and DAPI (blue) shown from MLD-STZ diabetic mice (STZ) treated with neratinib or vehicle throughout the whole experiment of 35 days and their control (vehicle). Quantification of data are shown in Figure 6h. Related to Figure 6. Scale bar, 100  $\mu$ m.

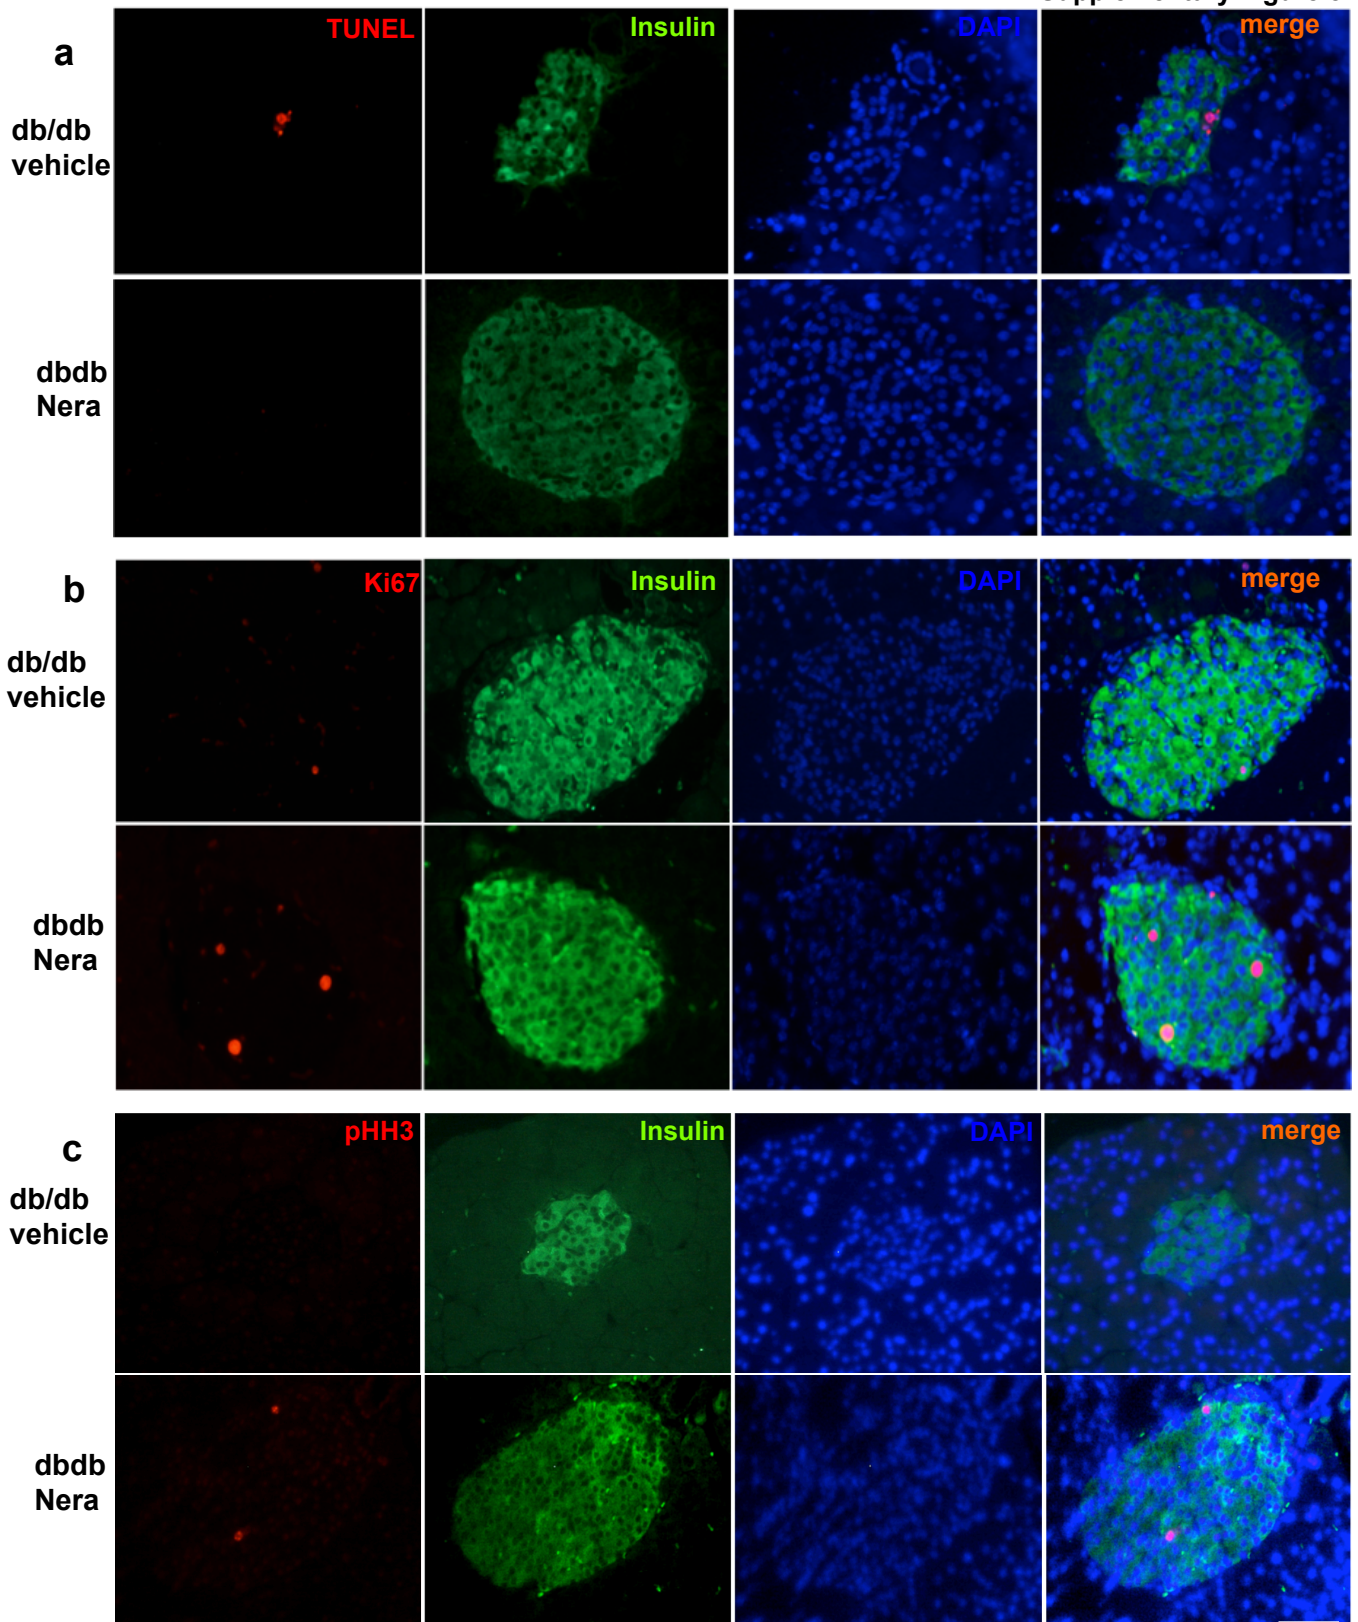

**Supplementary Figure 8. Neratinib restores  $\beta$ -cell survival in db/db mice.** Representative triple-stainings of pancreatic sections for TUNEL (a), Ki67 (b) and pHH3 (c) (red), insulin (green) and DAPI (blue) shown from db/db diabetic mice (dbdb) treated with neratinib or vehicle throughout the whole experiment of 31 days. Quantification of data are shown in Figure 8h-j. Related to Figure 8. Scale bar, 100  $\mu$ m.



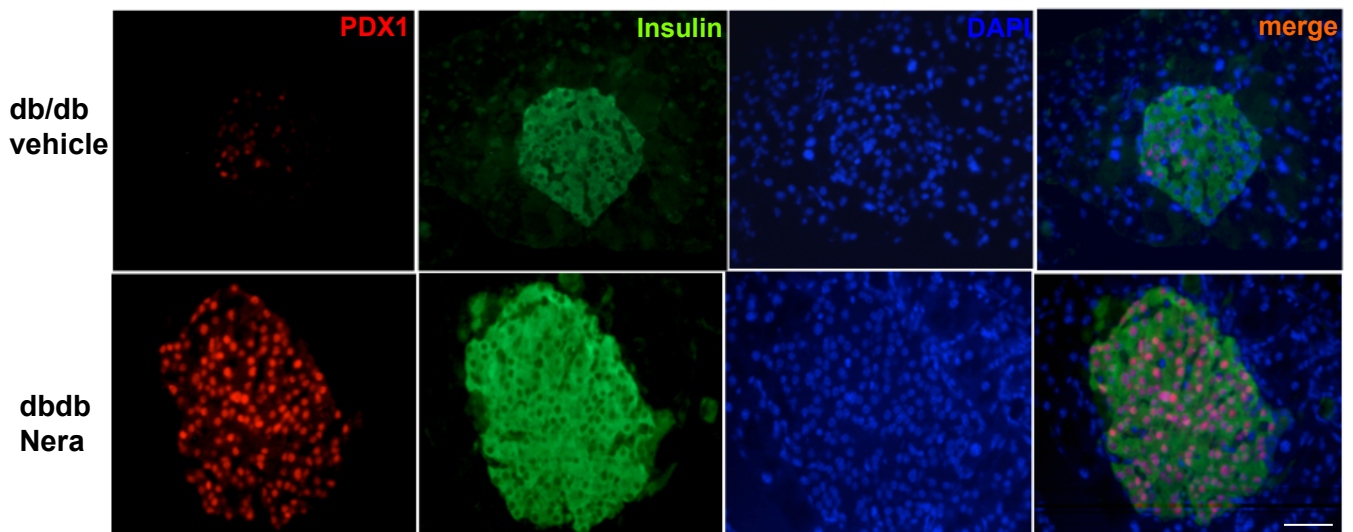

**Supplementary Figure 9. Neratinib restores PDX1 in db/db mice.** Representative triple-stainings of pancreatic sections for PDX1 (red), insulin (green) and DAPI (blue) shown from db/db diabetic mice (dbdb) treated with neratinib or vehicle throughout the whole experiment of 31 days. Quantification of data are shown in Figure 8k. Related to Figure 8. Scale bar, 100  $\mu$ m.

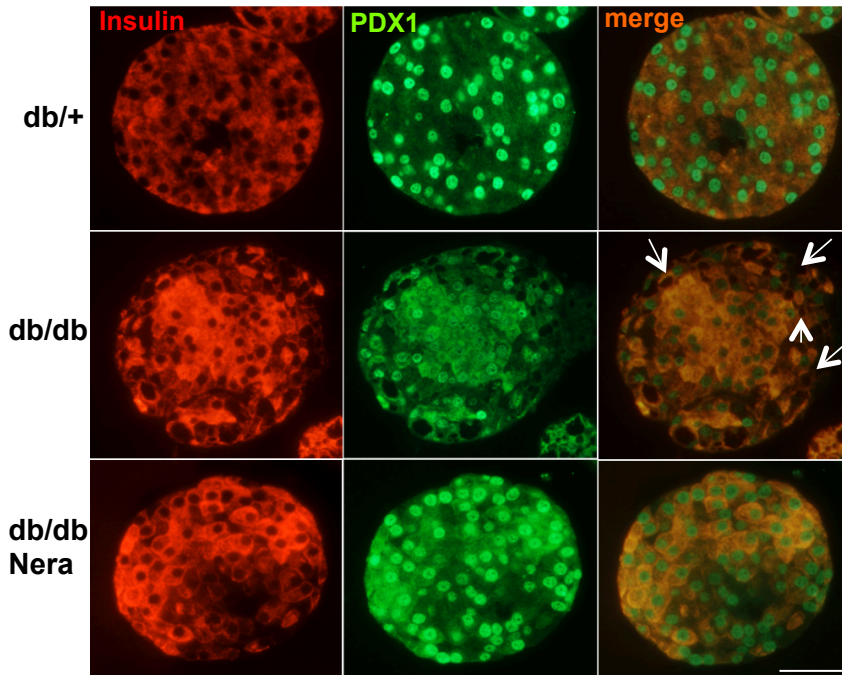

**Supplementary Figure 10. Neratinib improves PDX1 nuclear localization in db/db mouse islets ex vivo.** Representative double-stainings for PDX1 (green) and insulin (red) shown from isolated islets from 10-week old heterozygous db/+ mice or db/db littermates exposed to vehicle or to 10  $\mu$ M neratinib for 24h. Representative microscopical images are shown. White arrow point to PDX1 deficient nuclei in db/db mouse islets. Related to Figure 9. Scale bar, 100  $\mu$ m



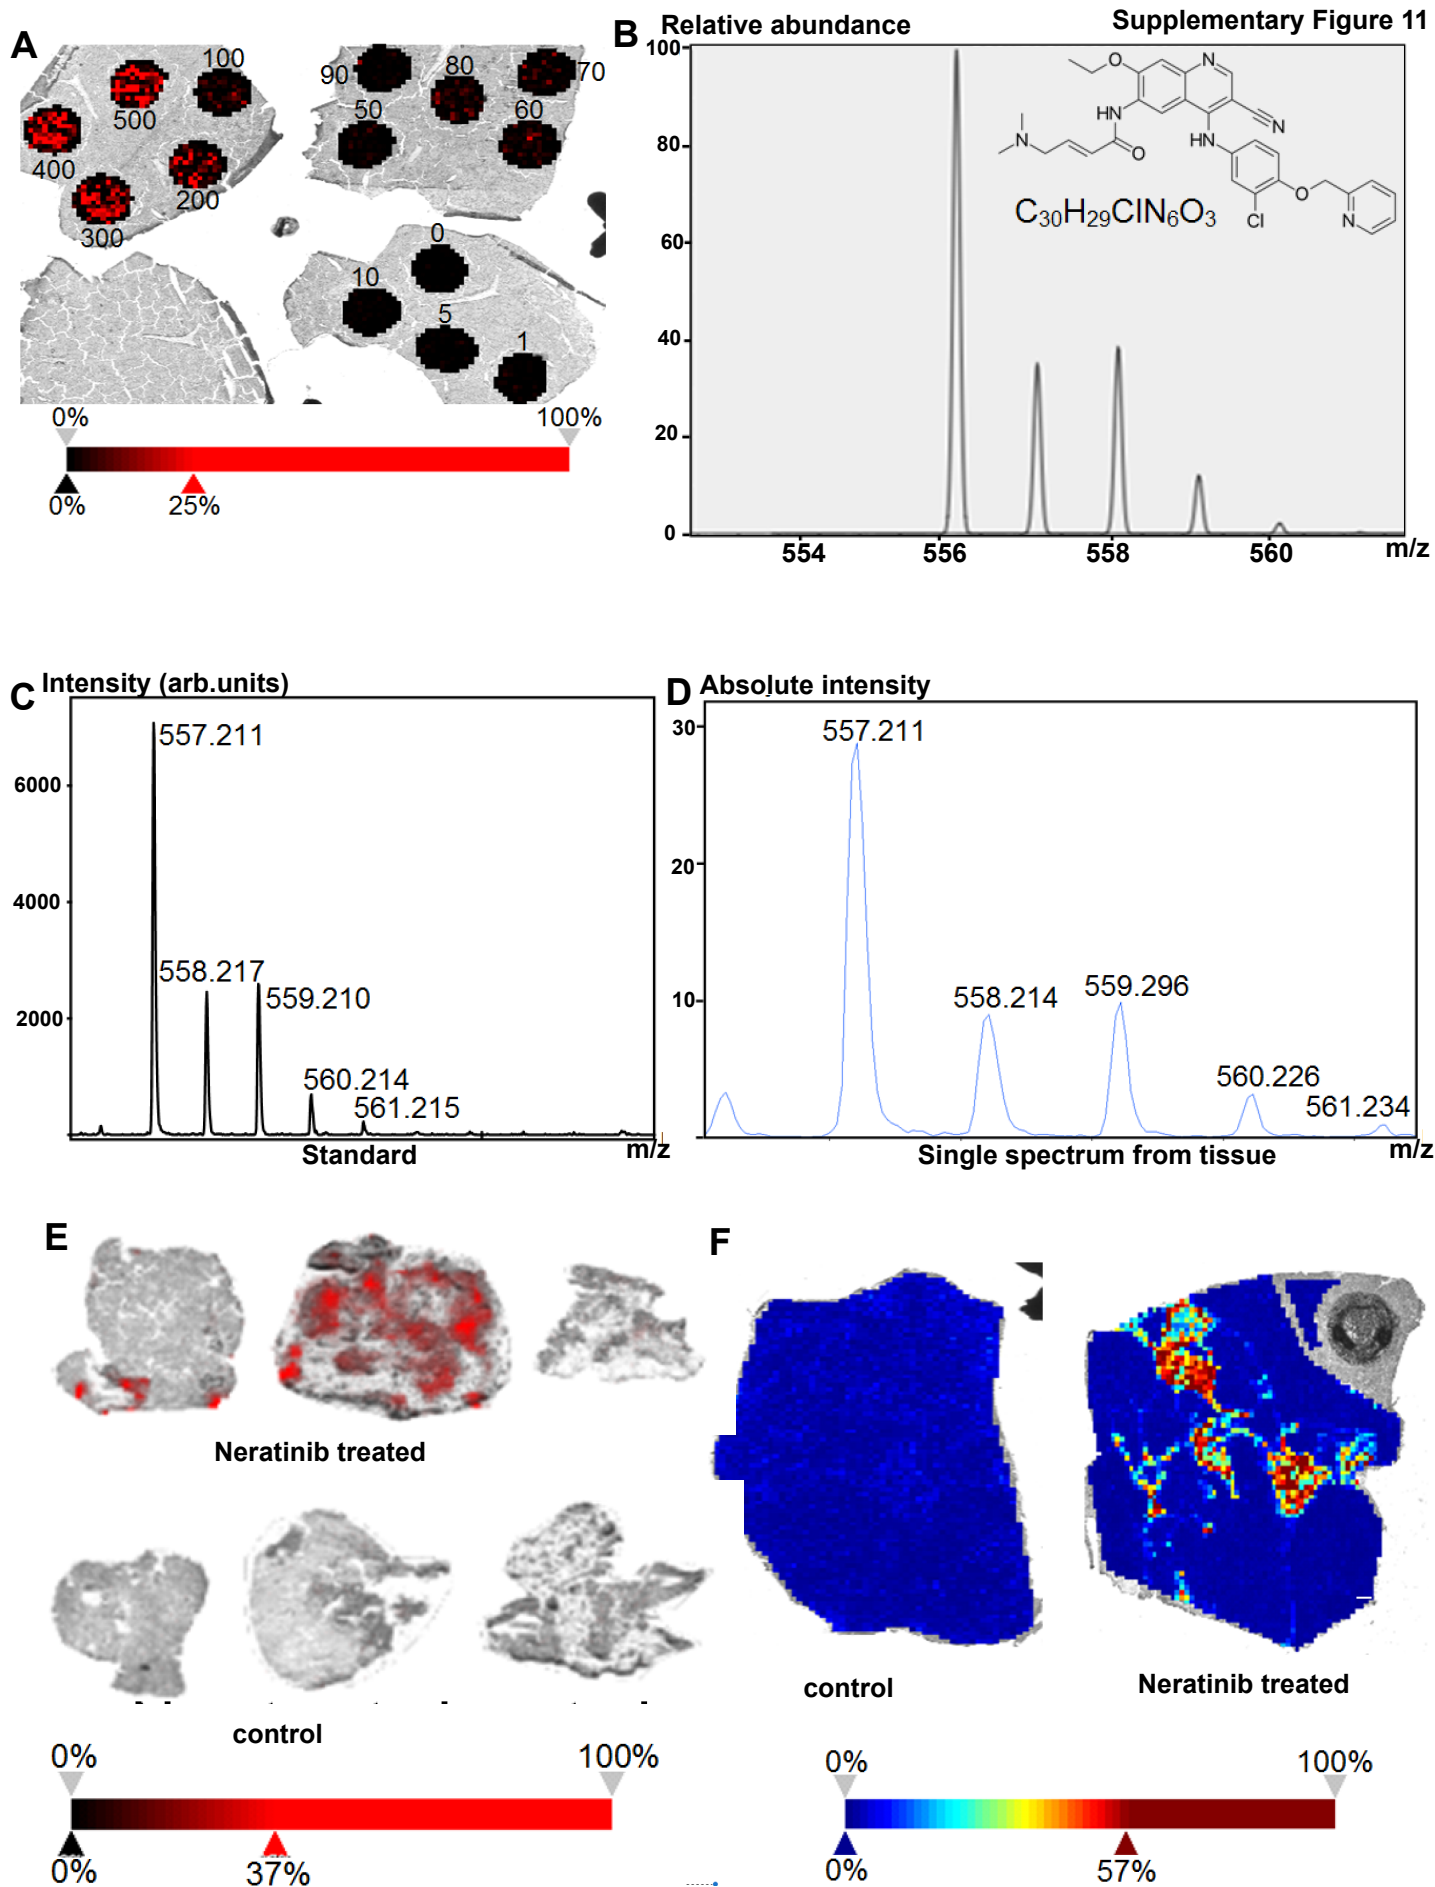

**Supplementary Figure 11. Neratinib is enriched and distributed throughout the pancreas.** MALDI Imaging MS of Neratinib for localization of drug distribution in mice tissue sections. **(A)** The dynamic range of the Neratinib signal (monoisotopic peak) in mice liver tissue sections after spotting neratinib standard with concentrations ranging from 0 to 500 pmol/ $\mu$ l is presented. **(B)** The single spectrum of the Neratinib standard spotted on a MALDI steel target shows the distinct isotopic pattern of the drug **(C)** compared to the simulated isotope pattern of  $C_{30}H_{29}ClN_6O_3$  (Patiny and Borel, 2013). **(D)** This pattern could be unambiguously detected in the MALDI imaging MS study of pancreas tissue sections as shown by the representative single spectrum. **(E)** The neratinib signal at m/z 577.2 is clearly located in the treated pancreas sections (top) and absent in the non-treated control sections from obese db/db mice used in the study (bottom). **(F)** Distribution of Neratinib in the pancreas sections of wild-type mice 4h after injection (right) compared to the non-treated control (left). Scale bar, 100  $\mu$ m
